# Supplementary material for: Apple Pomace Modulates the Microbiota and Increases the Propionate Ratio in an In Vitro Piglet Gastrointestinal Model
Source: MDPI journal article supplement (doi:10.3390/fermentation8080408), 2022-08-19
Supplement: s1 [file s1]

# Apple Pomace Modulates the Microbiota and Increases the Propionate Ratio in an In Vitro Piglet Gastrointestinal Model

Sandrine Dufourny, Sarah Lebrun, Caroline Douny, Benjamin Dubois, Marie-Louise Scippo, José Wavreille, Pierre Rondia, Nadia Everaert and Véronique Delcenserie

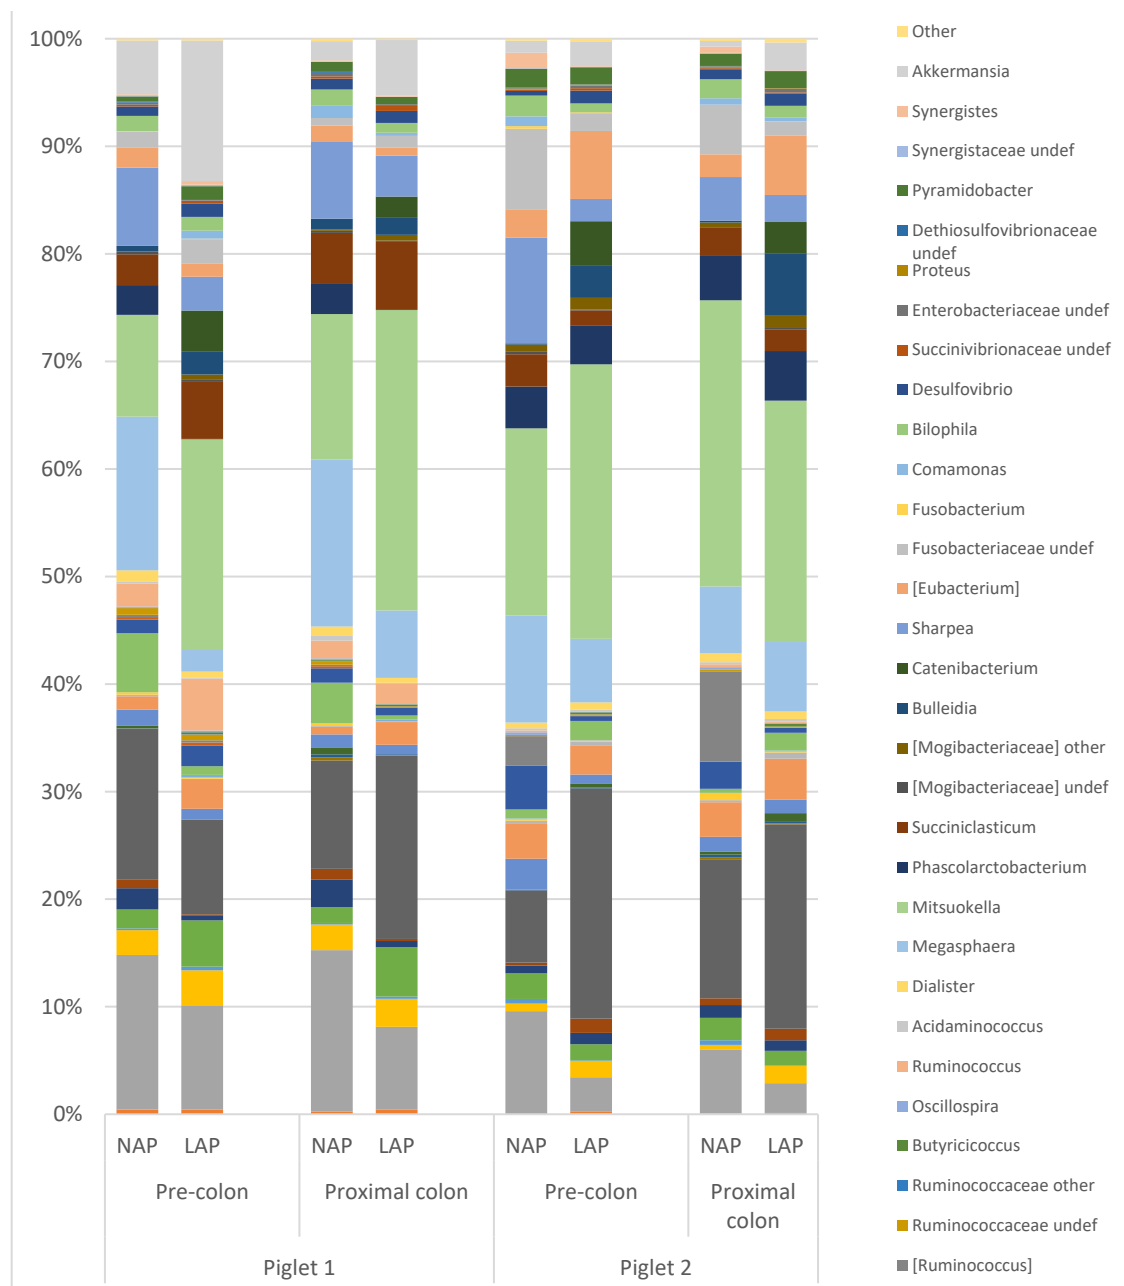

**Supplementary Material - Figure S1.** Relative abundances of the genera observed in the pre-colon and proximal colon bioreactors of baby-SPIME when using AP (LAP) or not (NAP) for two donor piglets.
